# Supplementary material
Source: publisher site journal article supplement (https://www.spandidos-publications.com/7784/downloadSupplementary)
Supplement: Supplementary file 1 [file downloadSupplementary]

**Table SI.** Primer sequences for reverse transcription-quantitative polymerase chain reaction.

| <b>Gene symbol</b> | <b>Forward, 5'-3'</b>   | <b>Reverse, 5'-3'</b>    |
|--------------------|-------------------------|--------------------------|
| <i>ACTB</i>        | TCATGAAGTGTGACGTGGACATC | TGCATCCTGTCGGCAATG       |
| <i>ABCBI</i>       | TTCCTTCACCCAGGCAATG     | ATGAGTTTATGTGCCACCAAGTAG |
| <i>ABCG2</i>       | TGACGGTGAGAGAAAACCTTAC  | TGCCACTTTATCCAGACCT      |
| <i>CDH1</i>        | TGCCAGAAAATGAAAAGG      | GTGTATGTGGCAATGCGTTC     |
| <i>VEGFA</i>       | GCCCACTGAGGAGTCCAACA    | ACCGCCTCGGCTTGTCAC       |

*ACTB*,  $\beta$ -actin; *ABCBI*, ATP binding cassette subfamily B member 1; *ABCG2*, ATP binding cassette subfamily G member 2; *CDH1*, cadherin 1; *VEGFA*, vascular endothelial growth factor A.
